# Supplementary material for: Phytobacter diazotrophicus from Intestine of Caenorhabditis elegans Confers Colonization-Resistance against Bacillus nematocida Using Flagellin (FliC) as an Inhibition Factor
Source: MDPI journal article supplement (doi:10.3390/pathogens11010082), 2022-01-10
Supplement: s1 [file s1]

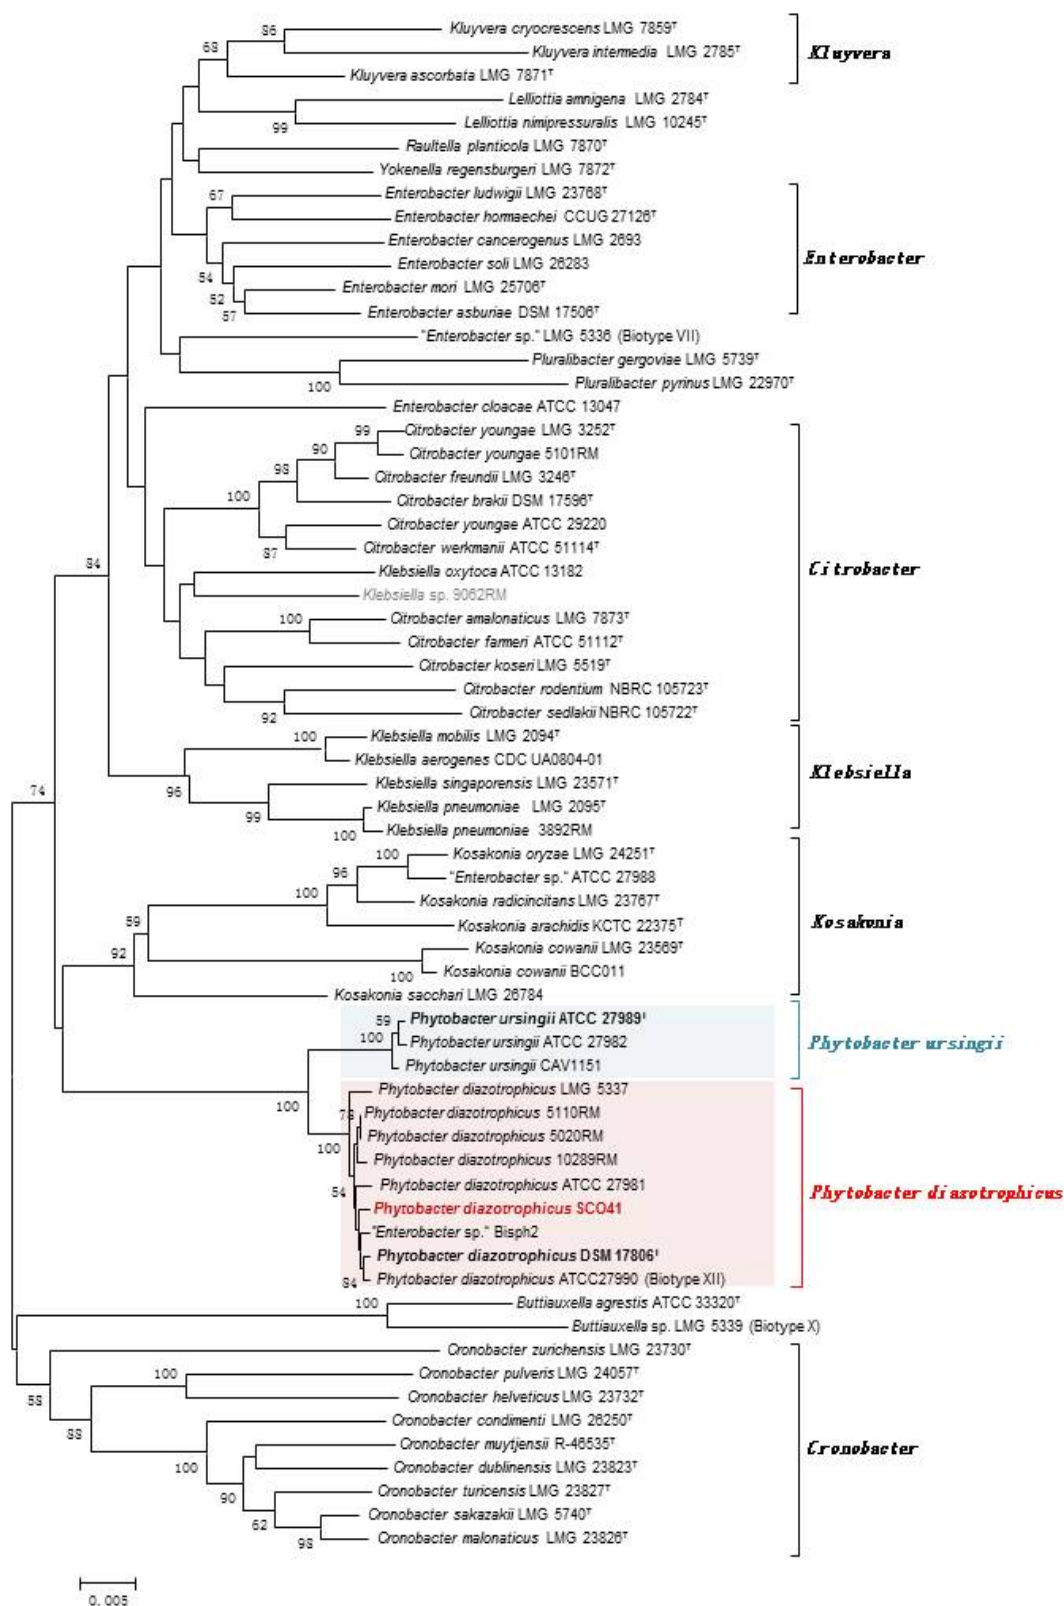

**Figure S1.** Neighbor-joining unrooted tree based on the concatenated partial *atpD*, *gyrB*, *infB* and *rpoB* gene sequences (2548 bp), depicting the relationships of *P. diazotrophicus* SCO41 and its nearest phylogenetic relatives. Bootstrap values of above 50 % are given at nodes based on 1000 replications. Bar, 1 % nucleotide substitutions. The superscript letters (T) represent typical strains of the species.

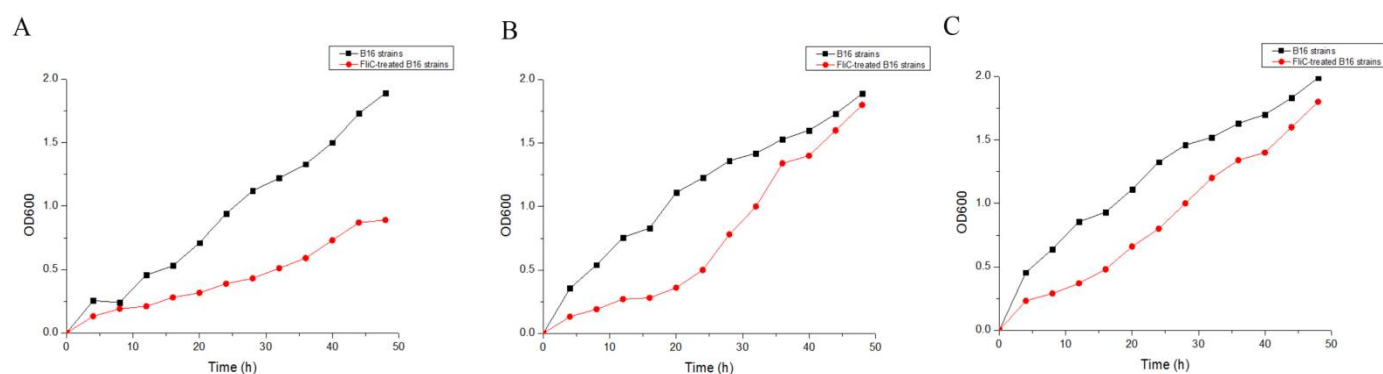

**Figure S2.** Results of the stress tolerance assays experiments. **(A)** Growth status of bacteria under heat stress; **(B)** Growth status of bacteria under drought stress; **(C)** Growth status of bacteria under H<sub>2</sub>O<sub>2</sub> stress.

**Table S1.** Interface amino acid residues between FliC and serine/threonine protein kinase of *B. nematocida* B16

| FliC      | Serine/Threonine Protein Kinase |
|-----------|---------------------------------|
| A: LEU9   | A: VAL186                       |
| A: LEU9   | A: LEU187                       |
| A: LEU12  | A: LEU187                       |
| A: LEU17  | A: PHE400                       |
| A: LYS19  | A: ILE404                       |
| A: SER20  | A: PHE400                       |
| A: ALA23  | A: PHE400                       |
| A: ALA23  | A: LEU403                       |
| A: ALA23  | A: ILE404                       |
| A: ARG30  | A: LEU403                       |
| A: ARG30  | A: PHE411                       |
| A: ARG30  | A: ILE414                       |
| A: ARG36  | A: PHE411                       |
| A: ASN38  | A: LYS408                       |
| A: ALA40  | A: PHE411                       |
| A: ALA40  | A: LEU415                       |
| A: LYS41  | A: LEU415                       |
| A: SER451 | A: PRO422                       |
| A: ARG452 | A: ILE419                       |
| A: ARG452 | A: ILE423                       |
| A: ASP455 | A: LEU415                       |
| A: ASP457 | A: LEU418                       |
| A: THR460 | A: TRP81                        |
| A: GLU461 | A: LEU418                       |
| A: GLU461 | A: ILE421                       |
| A: SER463 | A: TRP81                        |

|           |           |
|-----------|-----------|
| A: ASN464 | A: TRP81  |
| A: ASN464 | A: LEU85  |
| A: MET465 | A: PHE356 |
| A: MET465 | A: ILE414 |
| A: ARG467 | A: LEU82  |
| A: ARG467 | A: PHE356 |
| A: ARG467 | A: LEU360 |
| A: ALA468 | A: PHE356 |
| A: LEU471 | A: ILE363 |
| A: GLN472 | A: PHE400 |

**Table S2.** Interface amino acid residues between FliC and membrane protein insertase YidC of *B. nematocida* B16.

| FliC      | Membrane Protein Insertase YidC |
|-----------|---------------------------------|
| A: THR6   | B: TRP47                        |
| A: ASN7   | B: TRP47                        |
| A: SER10  | B: TRP47                        |
| A: ASN16  | B: PHE40                        |
| A: LYS19  | B: PHE40                        |
| A: ARG467 | B: PHE140                       |
| A: LEU471 | B: PHE140                       |
| A: ALA474 | B: ILE141                       |
| A: VAL478 | B: LEU75                        |
| A: GLN481 | B: ALA74                        |
| A: GLN481 | B: LEU78                        |
| A: GLN481 | B: PRO77                        |

**Table S3.** Interface amino acid residues between FliC and micro-aerobic cytochrome bd terminal oxidase CydB of *B. nematocida* B16 (small red box in Figure 10).

| FliC      | Membrane Protein |
|-----------|------------------|
| A: GLN21  | C: PHE766        |
| A: LEU24  | C: TYR770        |
| A: GLY25  | C: TYR770        |
| A: ILE28  | C: TYR770        |
| A: ILE470 | C: LEU767        |
| A: ILE470 | C: VAL774        |
| A: GLN473 | C: ALA771        |
| A: THR476 | C: PHE766        |

**Table S4.** Interface amino acid residues between FliC and micro-aerobic cytochrome bd terminal oxidase CydB of *B. nematocida* B16 (big red box in Figure 10).

| FliC       | Membrane Protein |
|------------|------------------|
| A: SER64   | B: PHE267        |
| A: ARG65   | B: PHE267        |
| A: ARG65   | B: PHE267        |
| A: ASN68   | B: ILE263        |
| A: ASN68   | B: PHE267        |
| A: ASP69   | B: PHE244        |
| A: ASP69   | B: PHE267        |
| A: ILE71   | B: TRP260        |
| A: ILE71   | B: ILE263        |
| A: ILE71   | C: ALA777        |
| A: ILE71   | C: LEU778        |
| A: SER72   | B: PHE244        |
| A: SER72   | B: ILE247        |
| A: GLN75   | B: ILE247        |
| A: GLN75   | B: LEU251        |
| A: GLN75   | B: TRP260        |
| A: THR76   | B: IL E247       |
| A: GLU78   | B: TRP250        |
| A: ASN82   | B: TRP250        |
| A: ASN82   | B: ARG254        |
| A: GLN130  | B: LEU243        |
| A: PHE131  | B: ILE240        |
| A: PHE131  | B: LEU243        |
| A: PHE131  | B: PHE244        |
| A: ASN132  | B: ILE240        |
| A: GL N429 | B: TRP260        |
| A: ASN430  | B: TRP260        |
| A: ASN433  | B: TRP260        |
| A: ASN444  | B: TYR320        |
